# Supplementary material for: Role of cytoplasmic localization of maspin in promoting cell invasion in breast cancer with aggressive phenotype
Source: PubMed Central journal article supplement (PMC8166868; doi:10.1038/s41598-021-90887-z), 2021-05-31
Supplement: 41598_2021_90887_MOESM2_ESM.pdf [file 41598_2021_90887_MOESM2_ESM.pdf]

## Figure S7

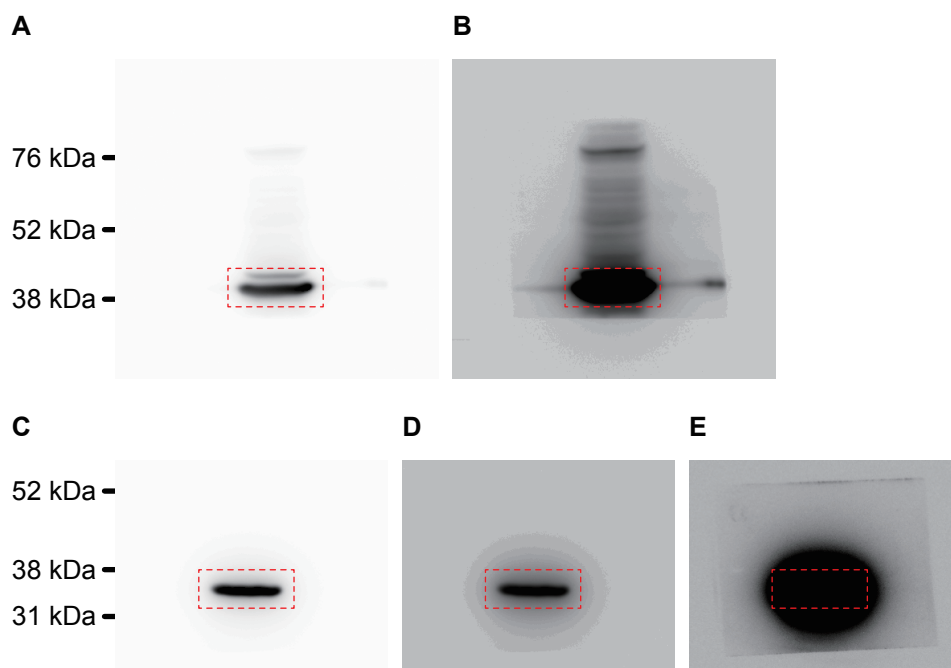

**Figure S7** Whole western blots from Figure 1B in the manuscript. Amersham full-range rainbow molecularweight marker was used to calculate sample molecular weights and sizes in kDa are indicated. Panels A and C show the original images used for the detection of each protein. The brightness and contrast were not changed in the process of acquiring this images. Panels B, D, and E are the same images as A and C, but with different brightness, contrast, and exposure. Red dotted lines show the cropping locations.

## Figure S8

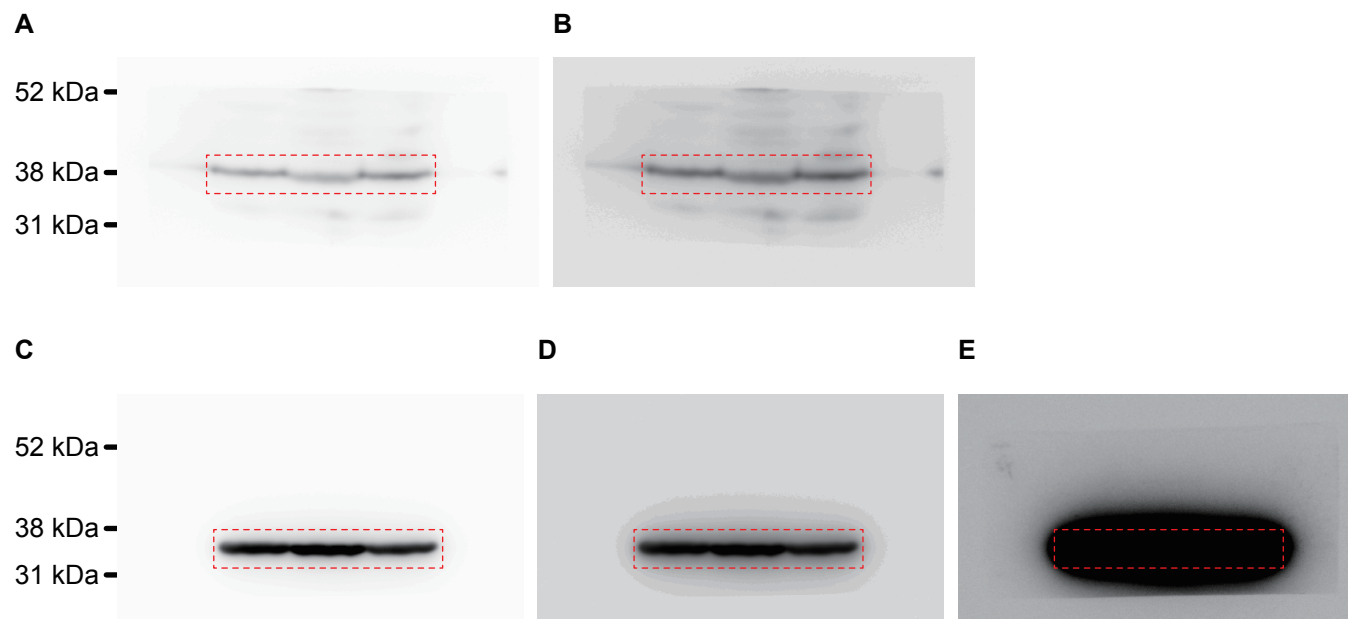

**Figure S8** Whole western blots from Figure 1D in the manuscript. Amersham full-range rainbow molecularweight marker was used to calculate sample molecular weights and sizes in kDa are indicated. Panels A and C show the original images used for the detection of each protein. The brightness and contrast were not changed in the process of acquiring this images. Panels B, D, and E are the same images as A and C, but with different brightness, contrast, and exposure. Red dotted lines show the cropping locations.

**Figure S9**

**A**

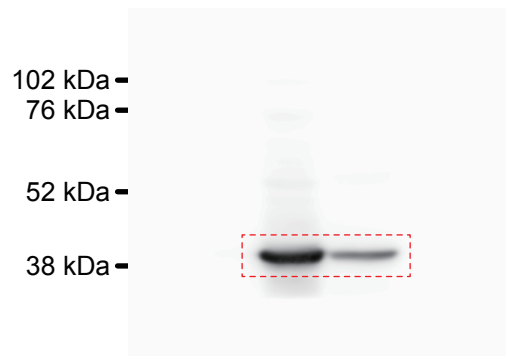

**B**

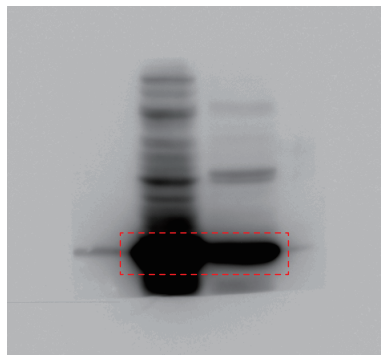

**C**

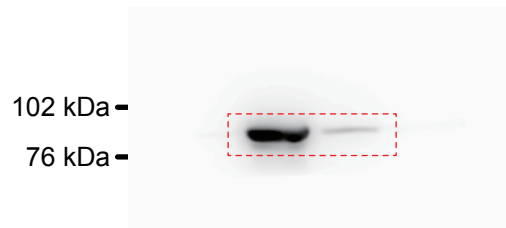

**D**

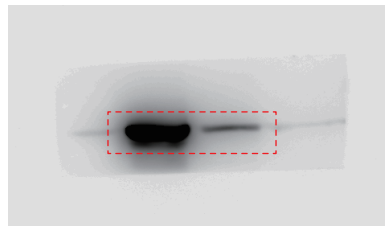

**E**

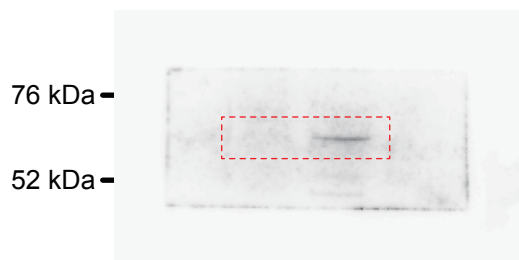

**F**

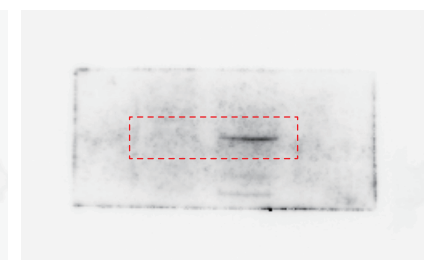

**G**

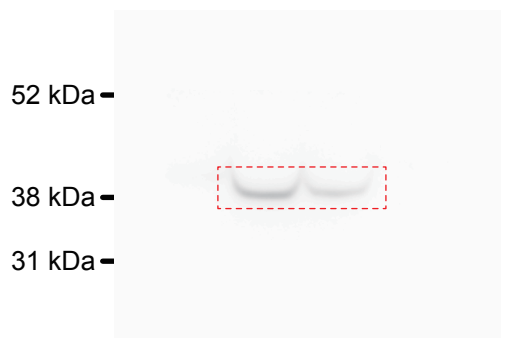

**H**

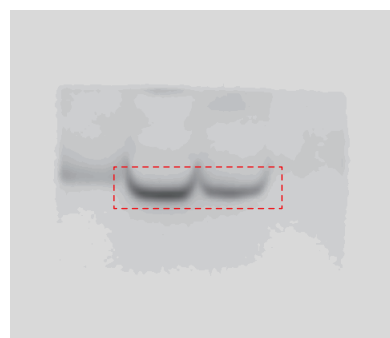

**I**

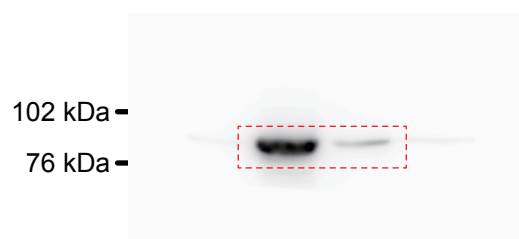

**J**

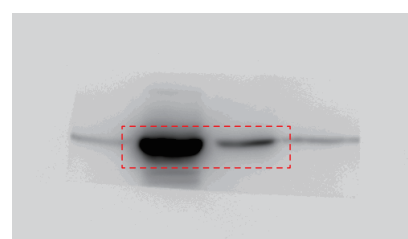

**K**

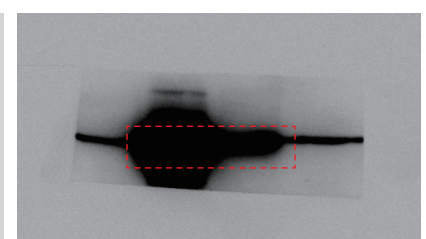

**L**

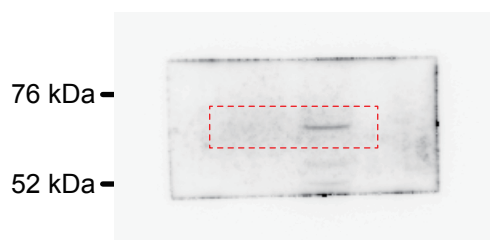

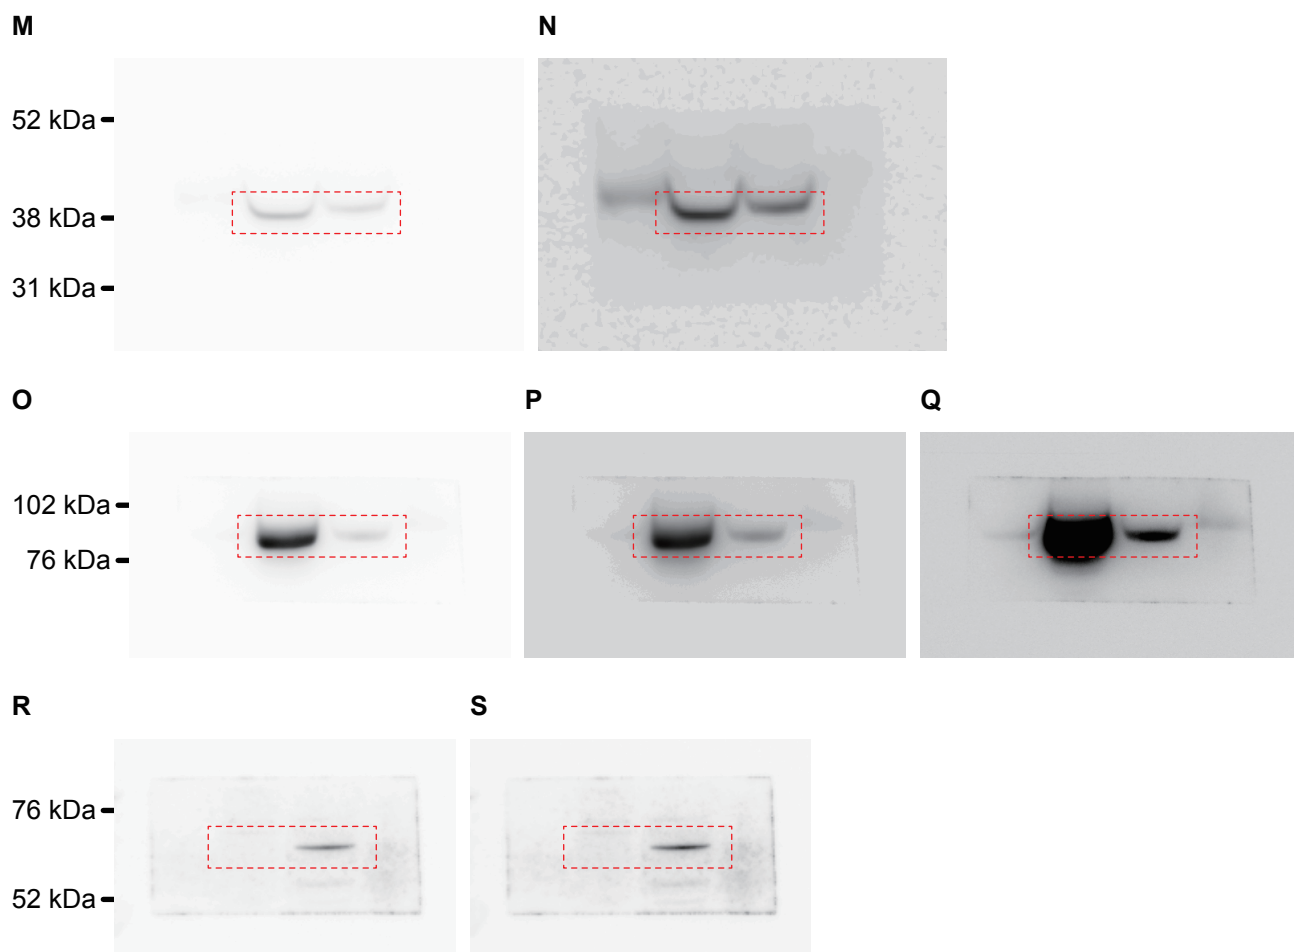

**Figure S9** Whole western blots from Figure 1G in the manuscript. Amersham full-range rainbow molecular-weight marker was used to calculate sample molecular weights and sizes in kDa are indicated. Panels A, C, E, G, I, L, M, O, and R show the original images used for the detection of each protein. The brightness and contrast were not changed in the process of acquiring this images. Panels B, D, F, H, J, K, N, P, Q, and S are the same images as A, C, E, G, I, L, M, O, and R, but with different brightness, contrast, and exposure. Red dotted lines show the cropping locations.

**Figure S10**

**A**

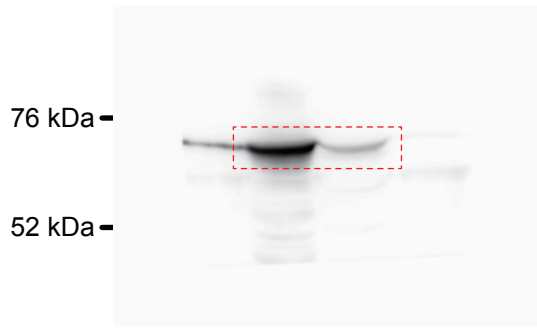

**B**

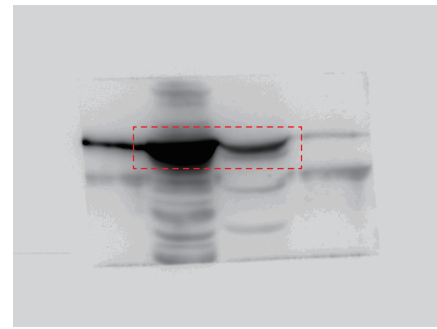

**C**

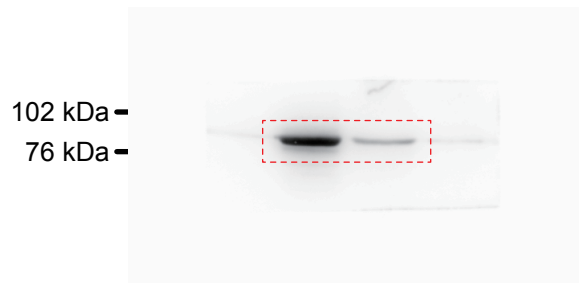

**D**

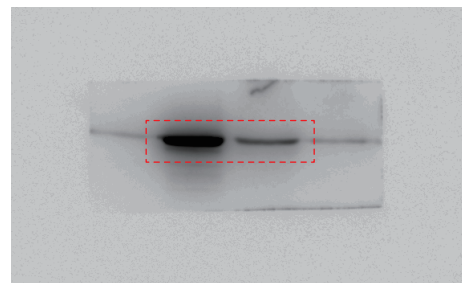

**E**

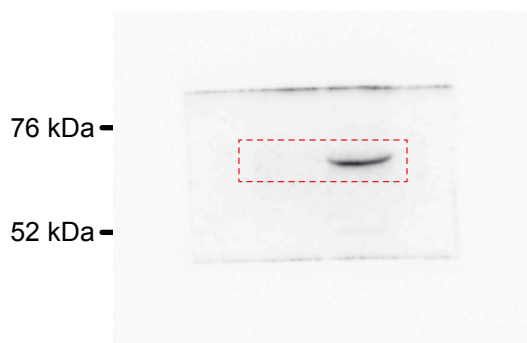

**F**

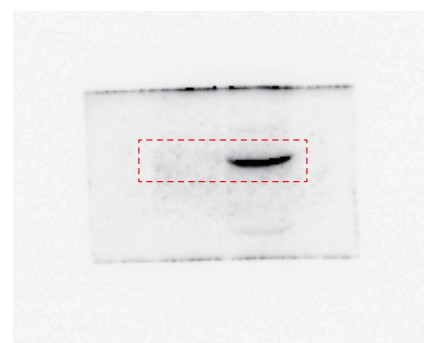

**G**

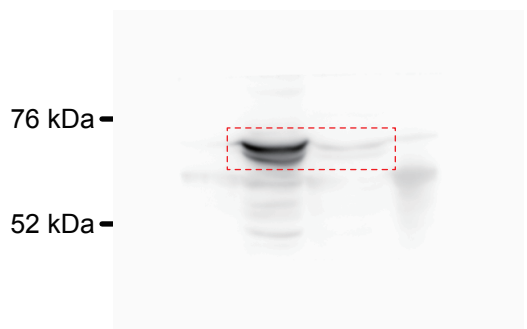

**H**

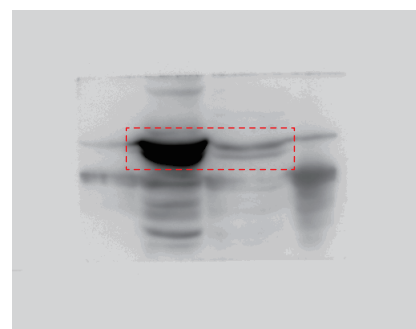

**I**

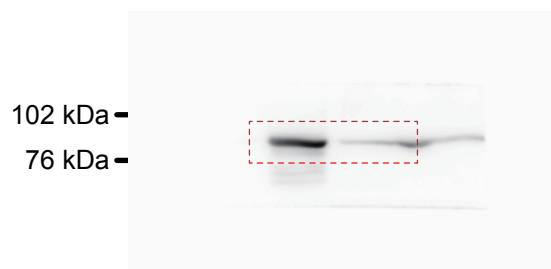

**J**

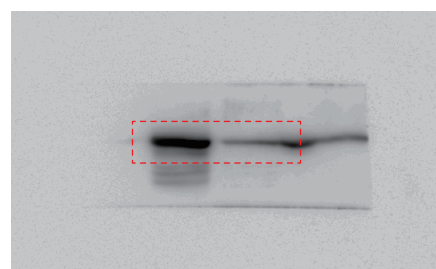

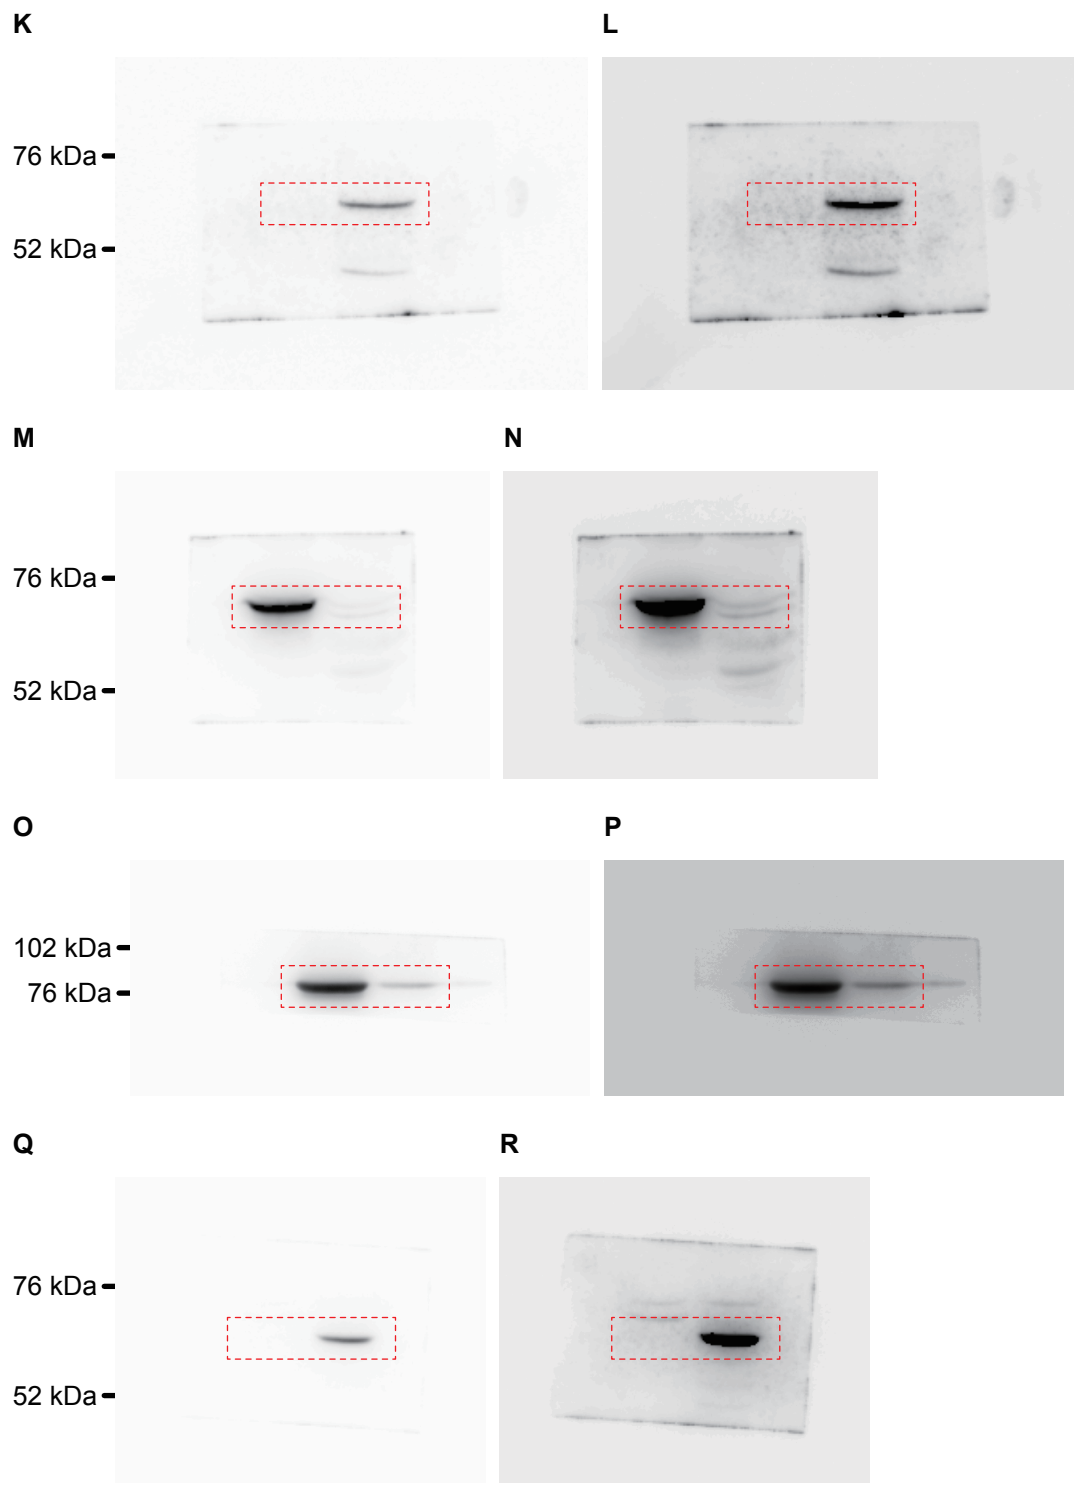

**Figure S10** Whole western blots from Figure 2C in the manuscript. Amersham full-range rainbow molecularweight marker was used to calculate sample molecular weights and sizes in kDa are indicated. Panels A, C, E, G, I, K, M, O, and Q show the original images used for the detection of each protein. The brightness and contrast were not changed in the process of acquiring this images. Panels B, D, F, H, J, L, N, P, and R are the same images as A, C, E, G, I, K, M, O, and Q, but with different brightness, contrast, and exposure. Red dotted lines show the cropping locations.

## Figure S11

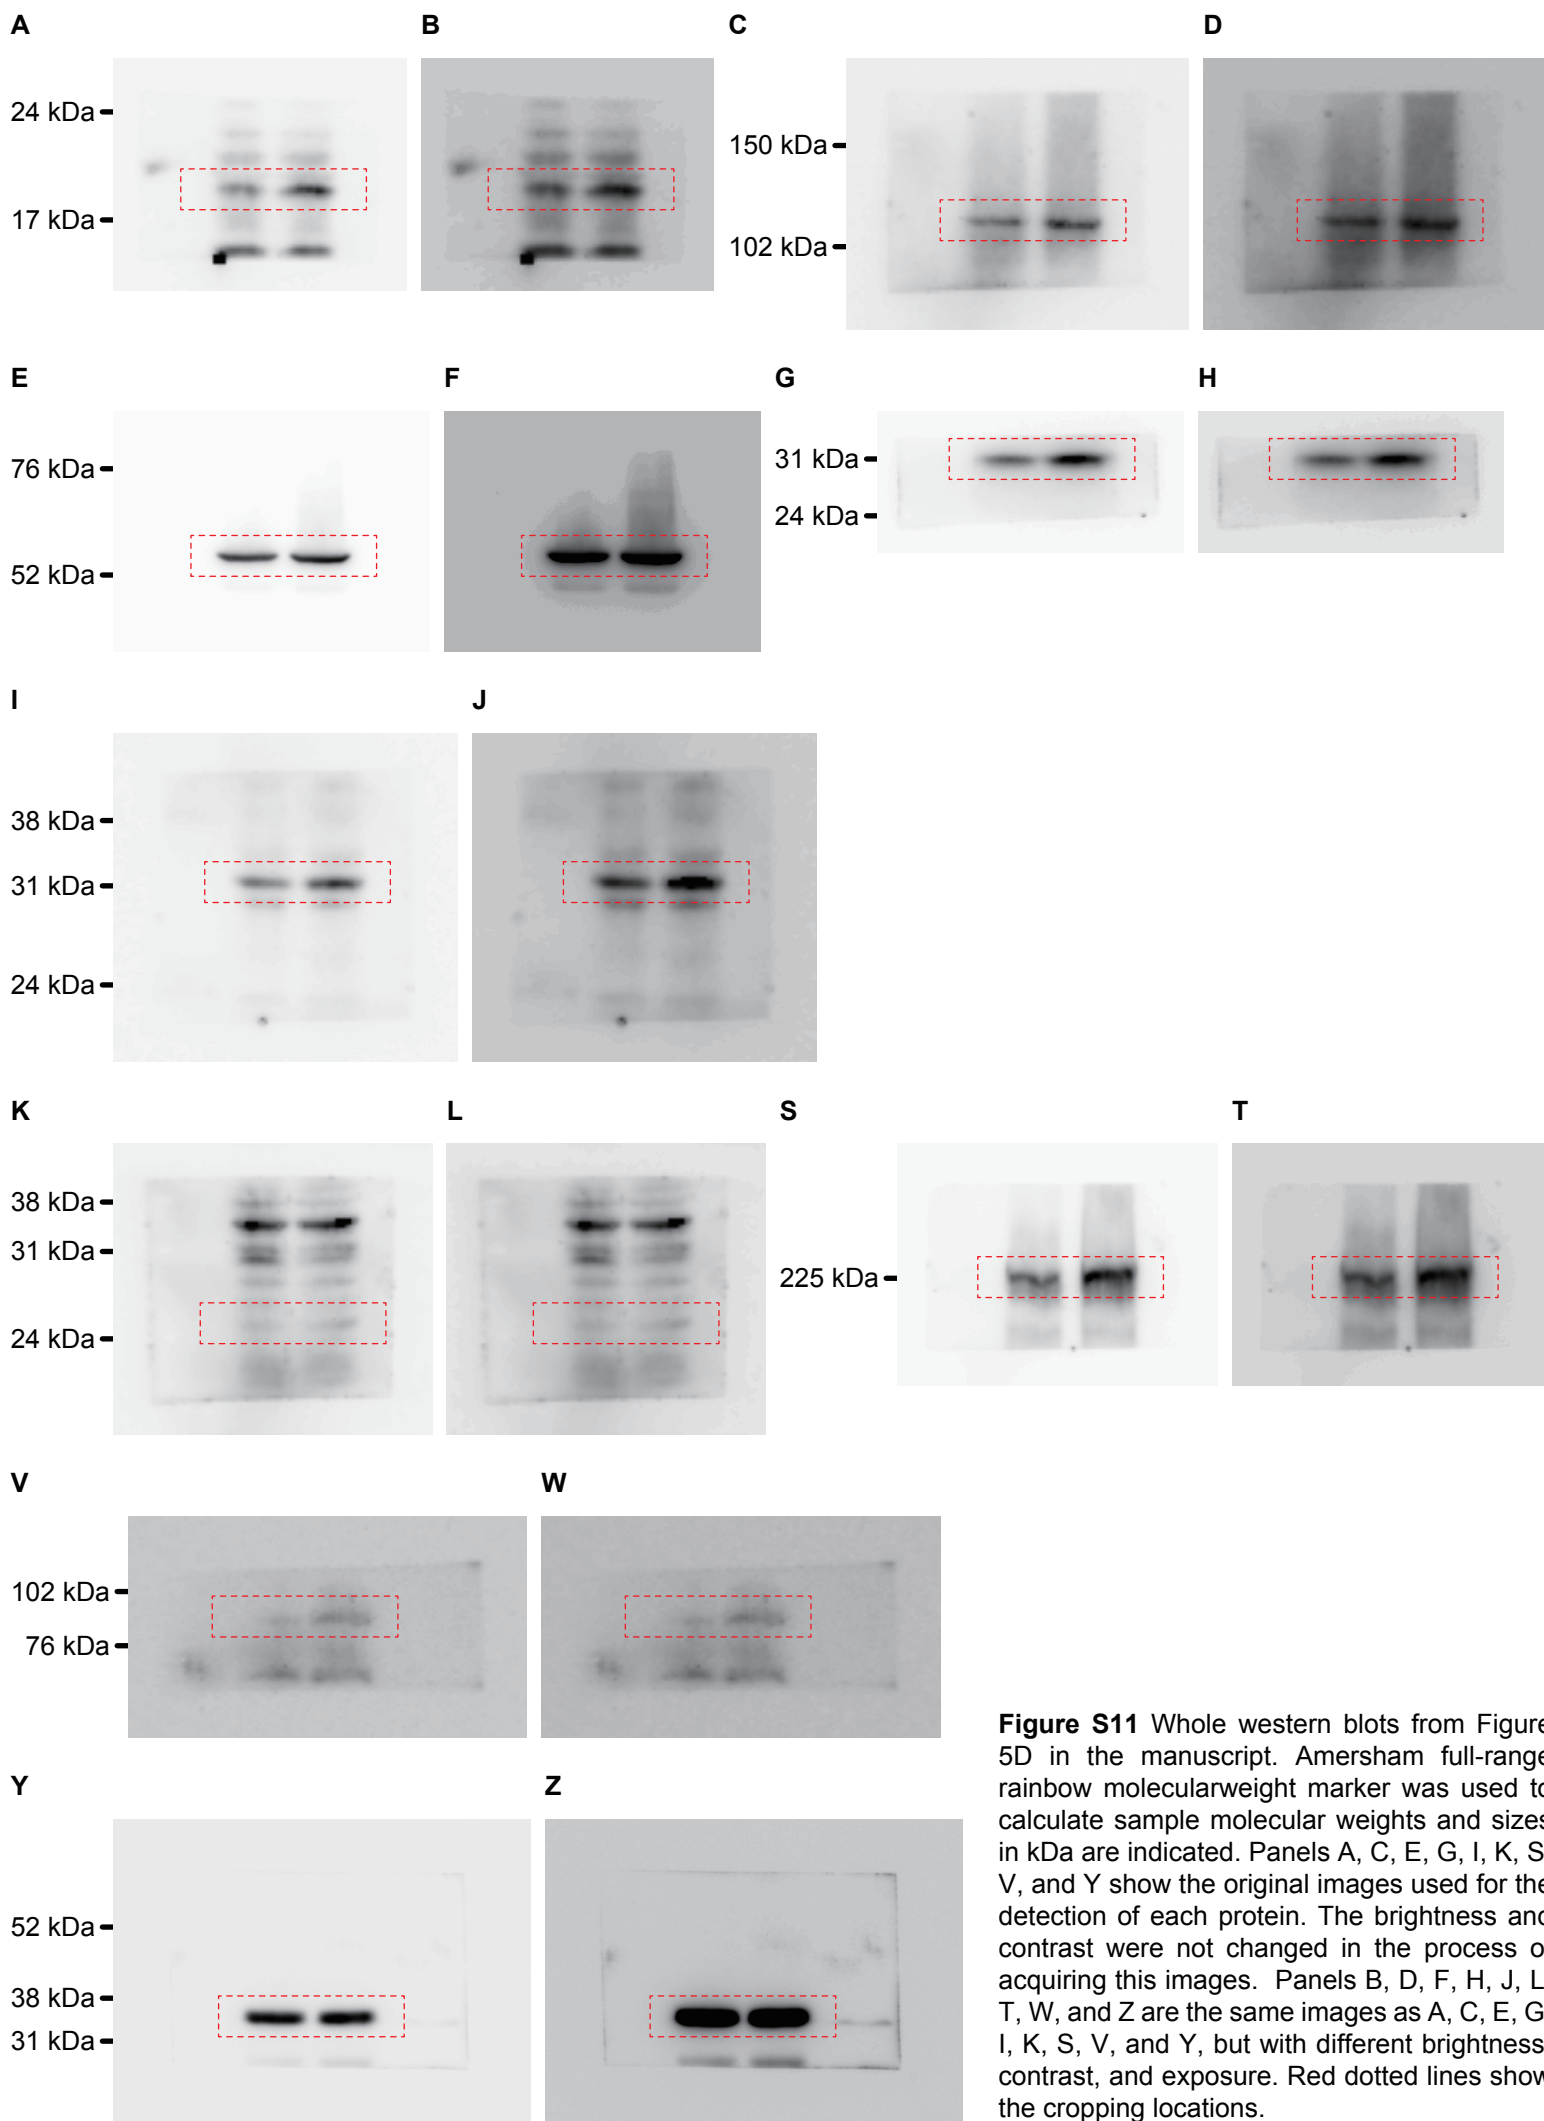

**Figure S11** Whole western blots from Figure 5D in the manuscript. Amersham full-range rainbow molecularweight marker was used to calculate sample molecular weights and sizes in kDa are indicated. Panels A, C, E, G, I, K, S, V, and Y show the original images used for the detection of each protein. The brightness and contrast were not changed in the process of acquiring this images. Panels B, D, F, H, J, L, T, W, and Z are the same images as A, C, E, G, I, K, S, V, and Y, but with different brightness, contrast, and exposure. Red dotted lines show the cropping locations.

**Figure S12**

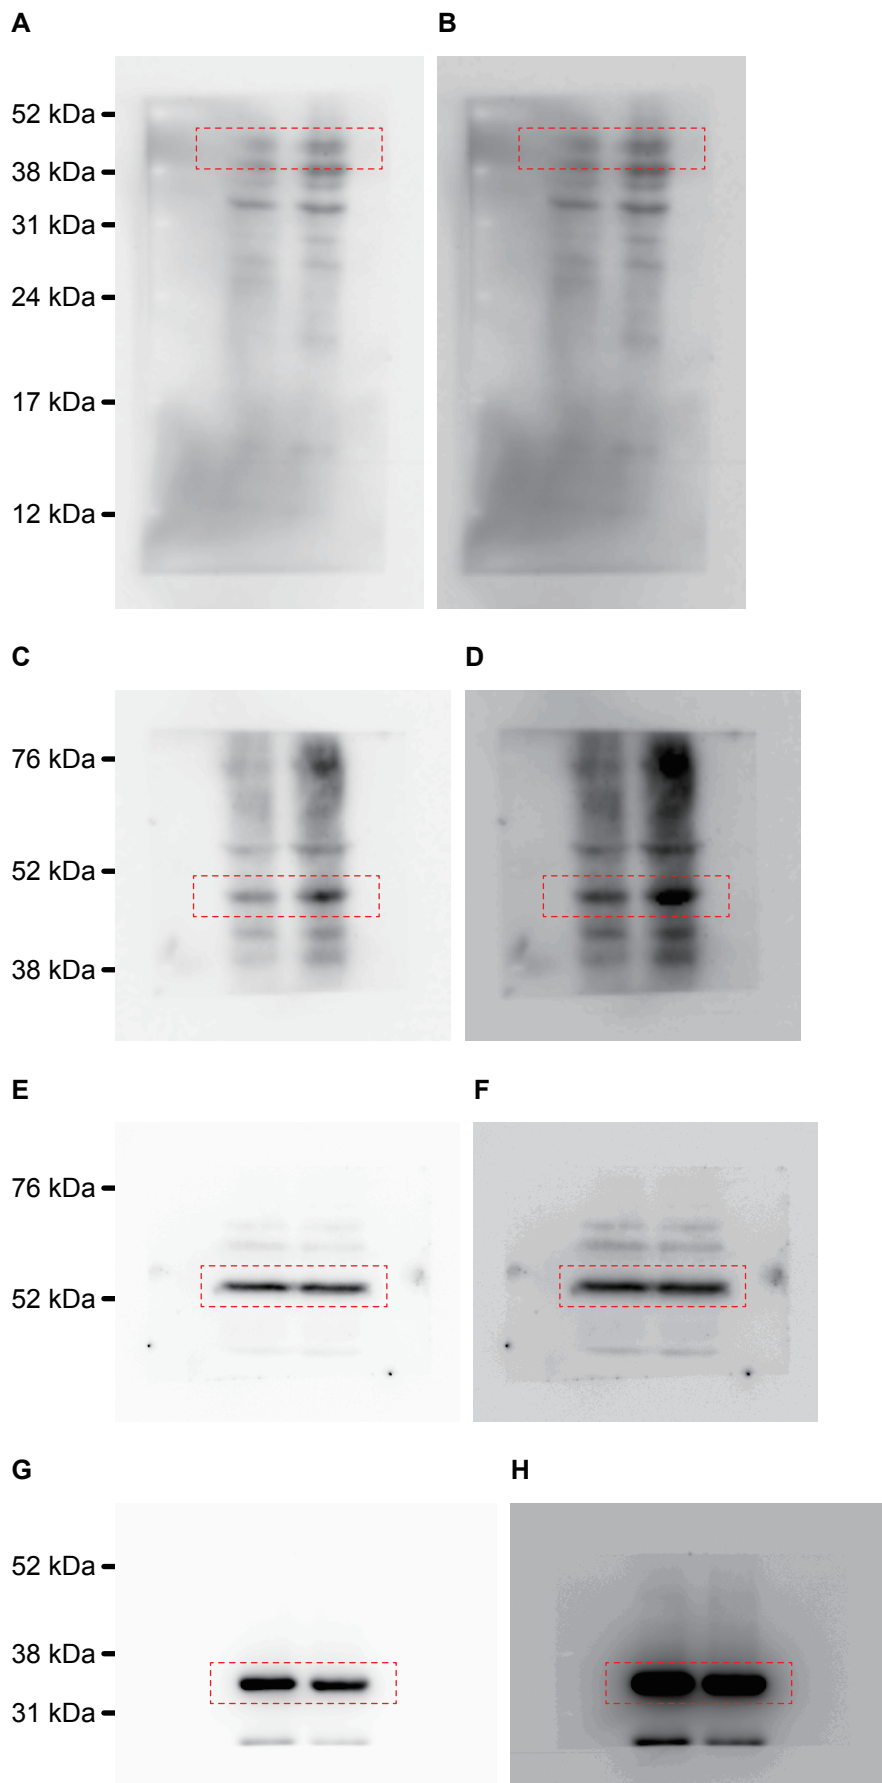

**Figure S12** Whole western blots from Figure 5F in the manuscript. Amersham full-range rainbow molecularweight marker was used to calculate sample molecular weights and sizes in kDa are indicated. Panels A, C, E, and G show the original images used for the detection of each protein. The brightness and contrast were not changed in the process of acquiring this images. Panels B, D, F, and H are the same images as A, C, E, and G, but with different brightness, contrast, and exposure. Red dotted lines show the cropping locations.



# Figure S13

A

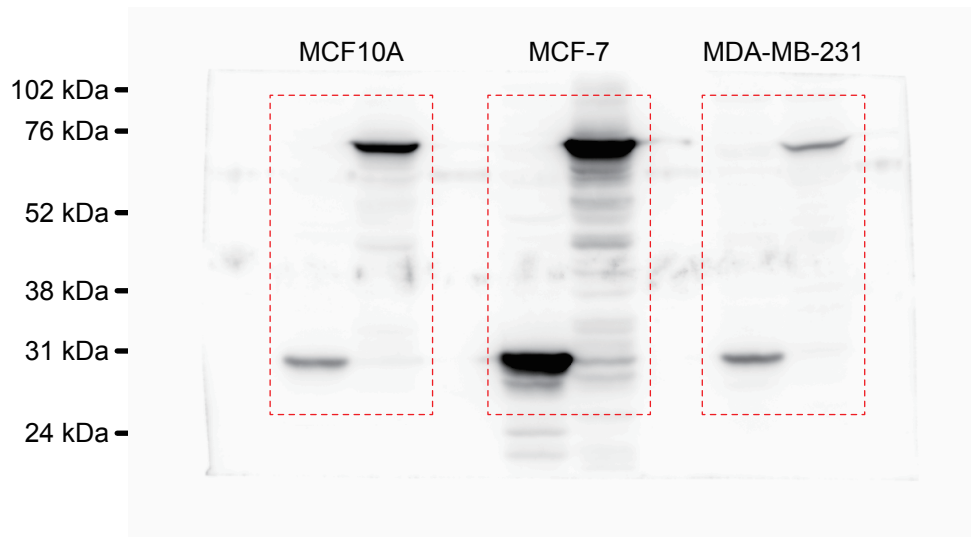

B

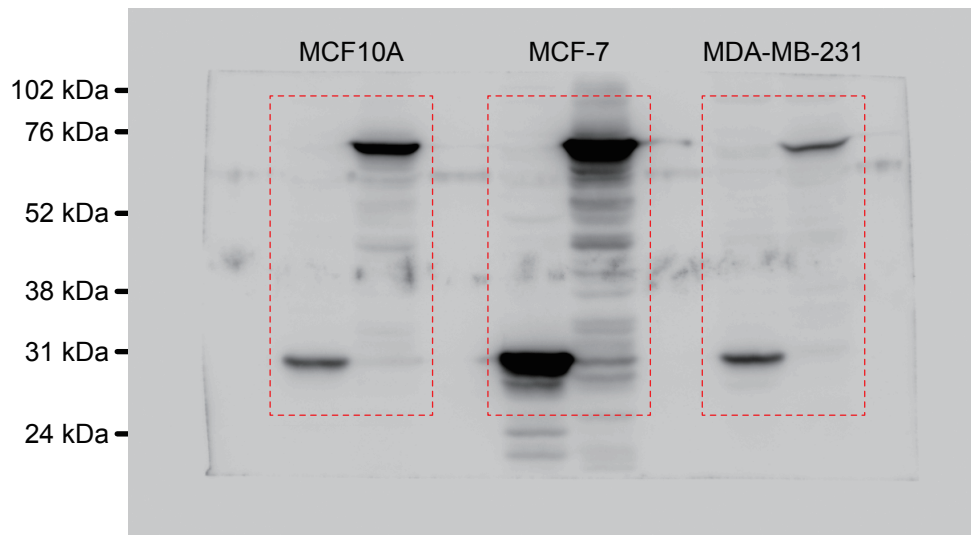

C

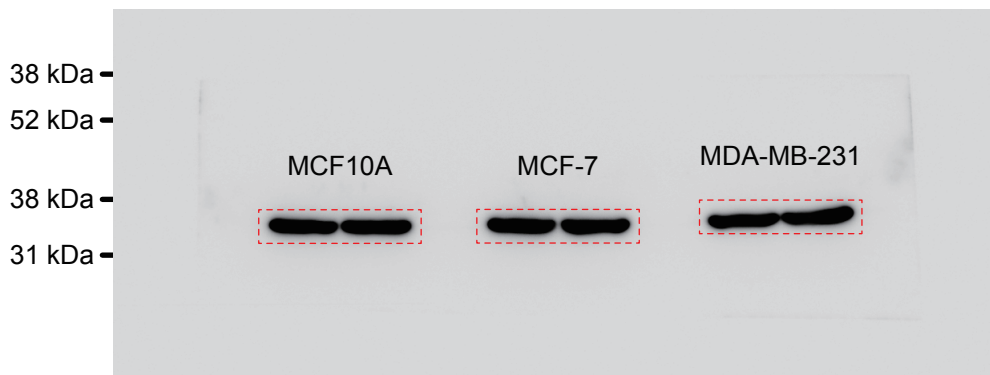

D

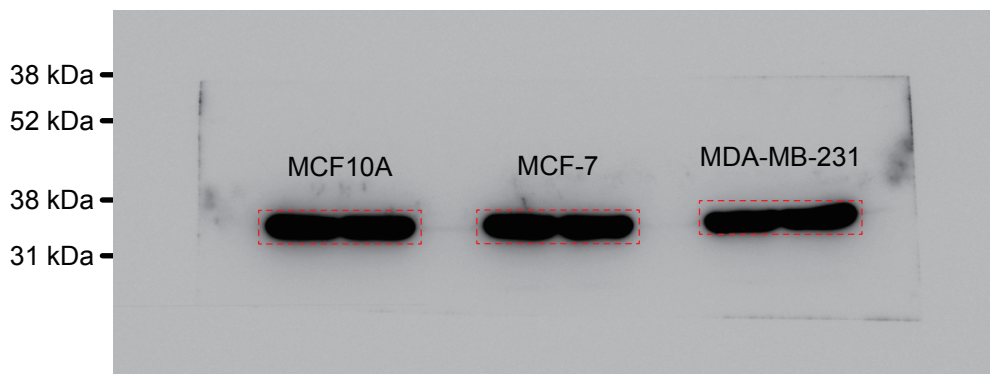

**Figure S13** Whole western blots from Supplementary Figure S2D in the manuscript. Amersham full-range rainbow molecular-weight marker was used to calculate sample molecular weights and sizes in kDa are indicated. Panels A, and C show the original images used for the detection of each protein. The brightness and contrast were not changed in the process of acquiring this images. Panels B, and D are the same images as A, and C, but with different brightness, contrast, and exposure. Red dotted lines show the cropping locations.

**Figure S14**

**A**

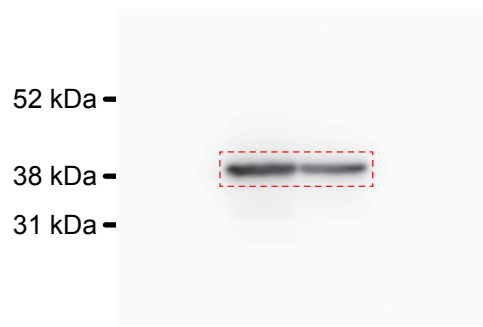

**B**

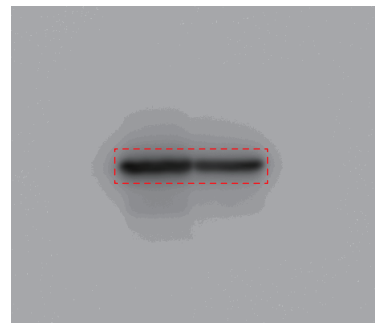

**C**

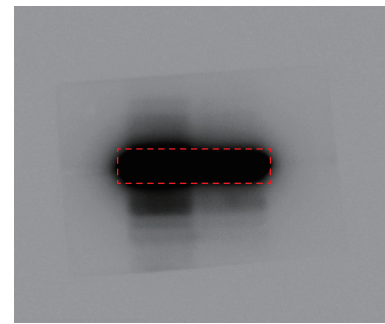

**D**

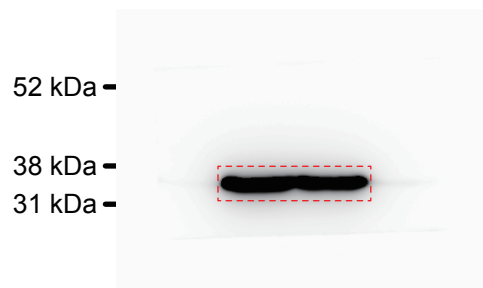

**E**

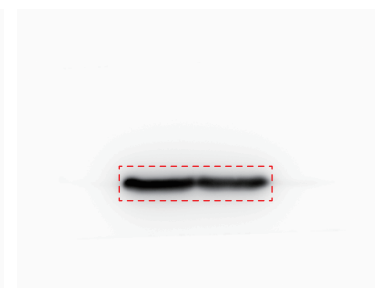

**F**

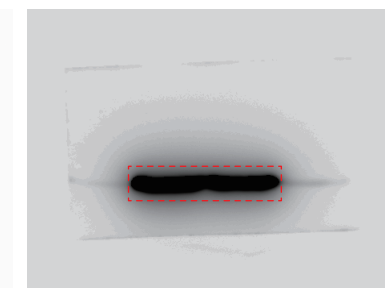

**G**

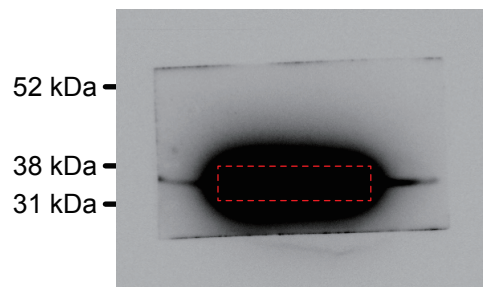

**H**

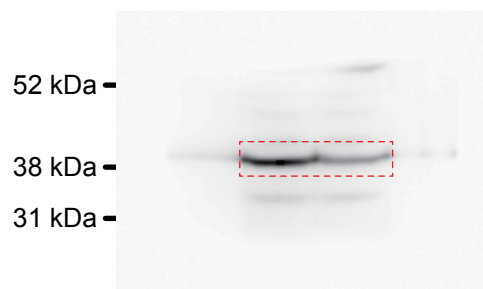

**I**

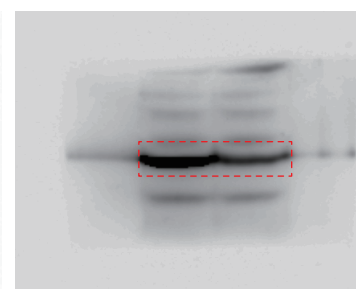

**J**

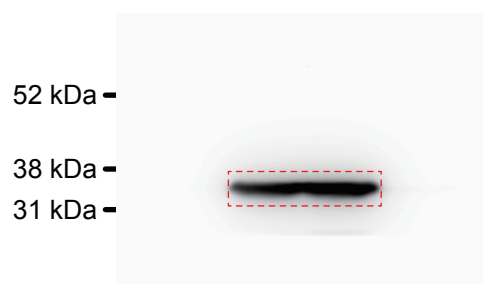

**K**

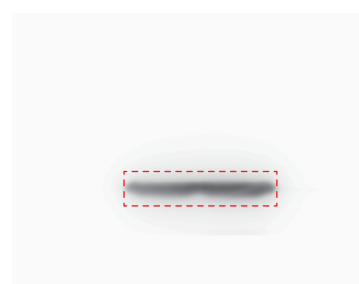

**L**

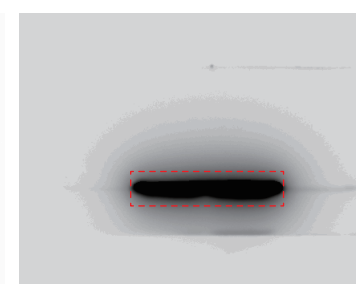

**M**

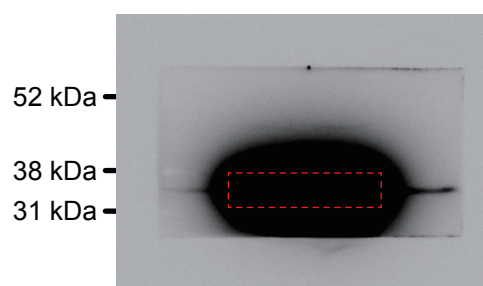

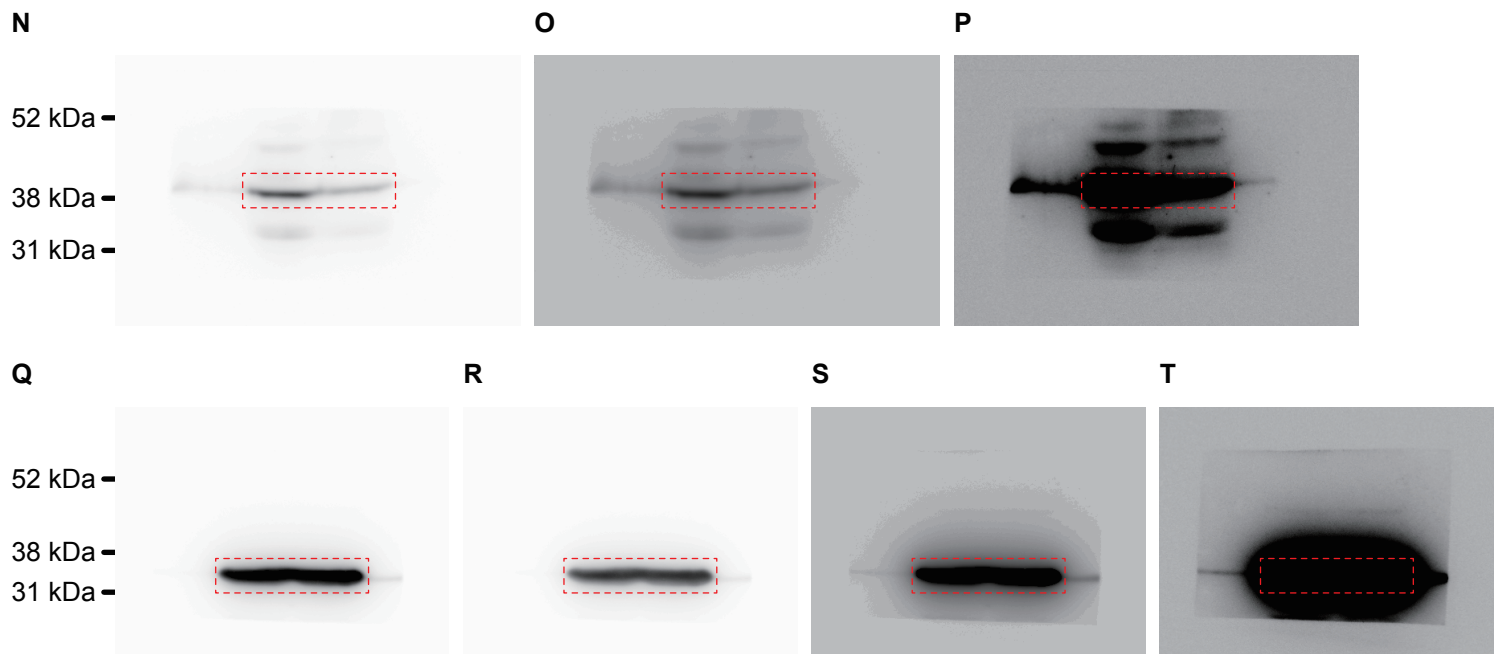

**Figure S14** Whole western blots from Supplementary Figure S3D in the manuscript. Amersham full-range rainbow molecular-weight marker was used to calculate sample molecular weights and sizes in kDa are indicated. Panels A, D, H, J, N, and Q show the original images used for the detection of each protein. The brightness and contrast were not changed in the process of acquiring this images. Panels B, C, E, F, G, I, K, L, M, O, P, R, S, and T are the same images as A, D, H, J, N, and Q, but with different brightness, contrast, and exposure. Red dotted lines show the cropping locations.

**Figure S15**

**A**

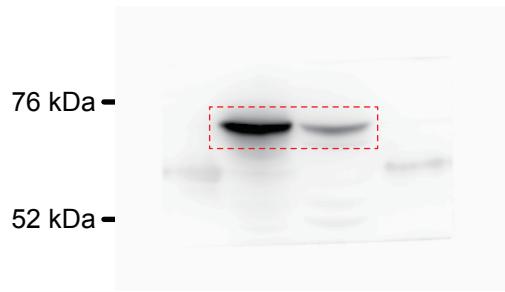

**B**

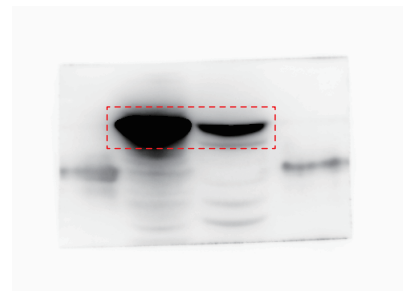

**C**

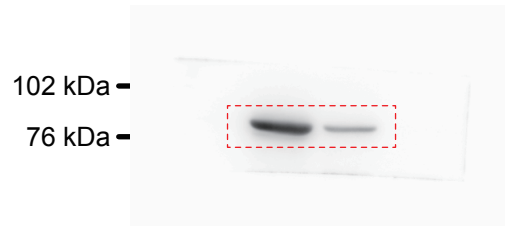

**D**

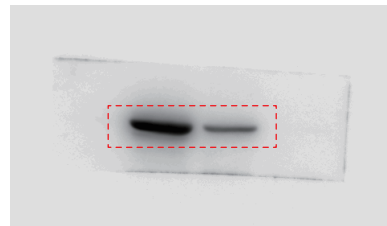

**E**

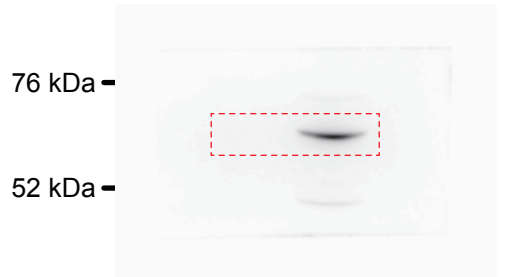

**F**

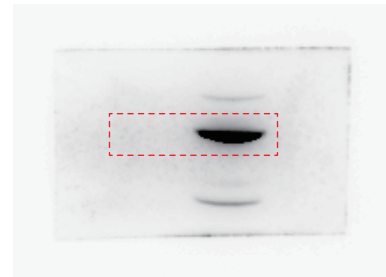

**G**

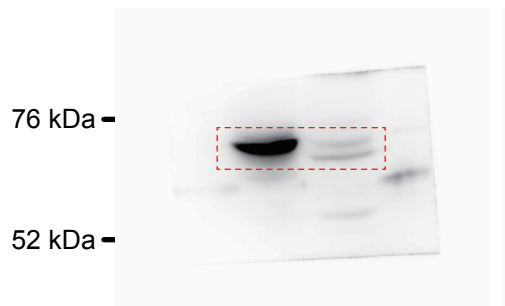

**H**

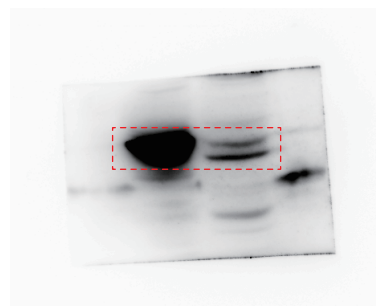

**I**

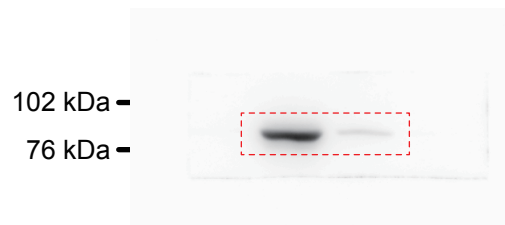

**J**

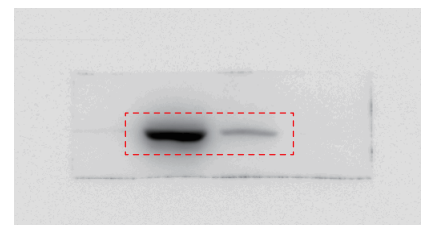

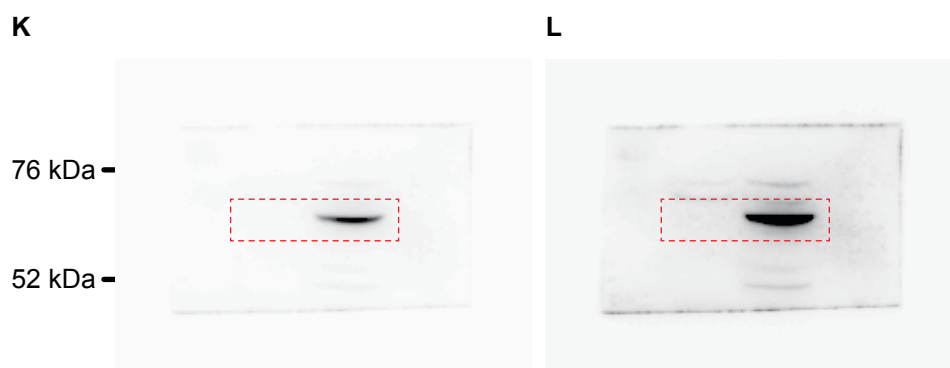

**Figure S15** Whole western blots from Supplementary Figure 4C in the manuscript. Amersham full-range rainbow molecularweight marker was used to calculate sample molecular weights and sizes in kDa are indicated. Panels A, C, E, G, I, and K show the original images used for the detection of each protein. The brightness and contrast were not changed in the process of acquiring this images. Panels B, D, F, H, J, and L are the same images as A, C, E, G, I, and K, but with different brightness, contrast, and exposure. Red dotted lines show the cropping locations.

**Figure S16**

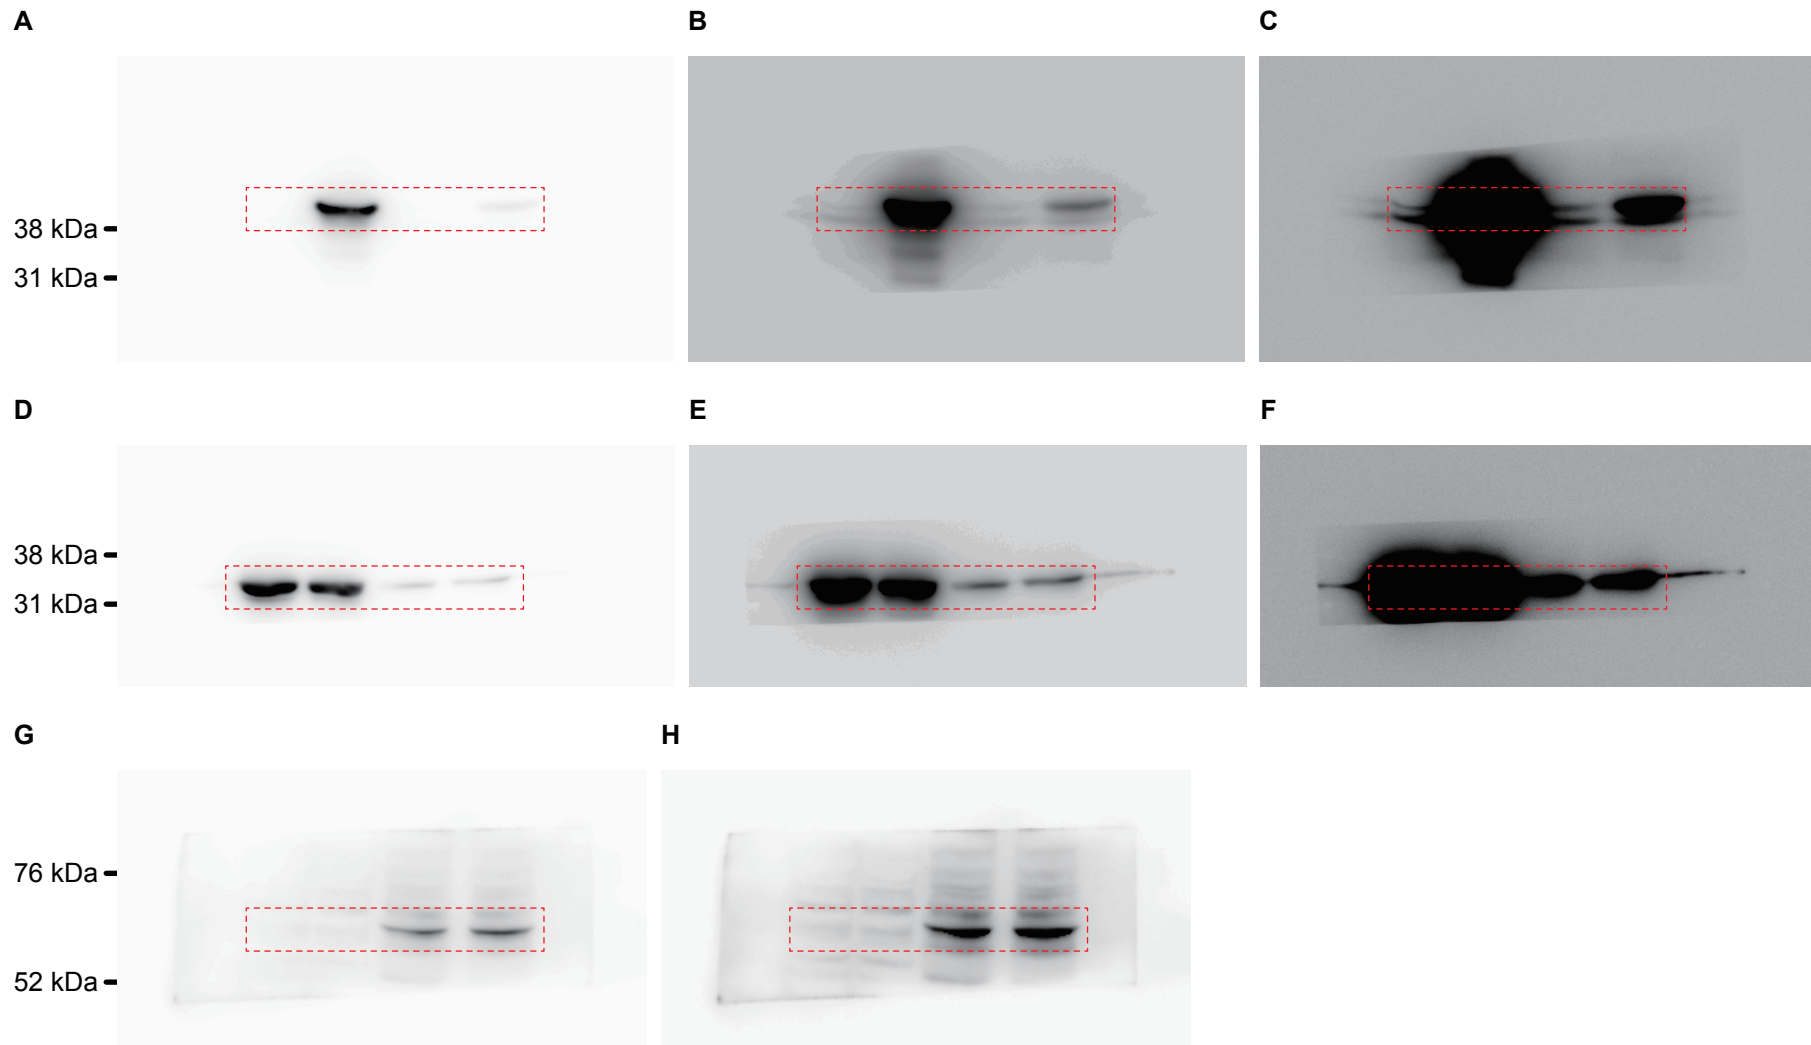

**Figure S16** Whole western blots from Supplementary Figure S5B and S5C in the manuscript. Amersham full-range rainbow molecularweight marker was used to calculate sample molecular weights and sizes in kDa are indicated. Panels A, D, and G show the original images used for the detection of each protein. The brightness and contrast were not changed in the process of acquiring this images. Panels B, C, E, F, and H are the same images as A, D, and G, but with different brightness, contrast, and exposure. Red dotted lines show the cropping locations.
